1           **The C-terminus is critical for the degradation of substrates by the**  
2                           *Pseudomonas aeruginosa* CtpA protease

3  
4                           **Sammi Chung and Andrew J. Darwin #**

5  
6  
7  
8       Department of Microbiology, New York University School of Medicine, New York, NY

9  
10  
11                   Running head: Role of substrate C-terminus in degradation by CtpA

12  
13  
14  
15  
16  
17  
18  
19  
20  
21  
22  
23   # Address correspondence to: Andrew J. Darwin, [andrew.darwin@med.nyu.edu](mailto:andrew.darwin@med.nyu.edu)

24 **ABSTRACT**

25 Bacterial carboxyl-terminal processing proteases (CTPs) are widely conserved and  
26 have been linked to important processes including signal transduction, cell wall  
27 metabolism, and virulence. However, the features that target proteins for CTP-  
28 dependent cleavage are unclear. Studies of the *Escherichia coli* CTP Prc suggested  
29 that it cleaves proteins with non-polar and/or structurally unconstrained C-termini, but it  
30 is not clear if this applies broadly. *Pseudomonas aeruginosa* has a divergent CTP,  
31 CtpA, which is required for virulence. CtpA works in complex with the outer membrane  
32 lipoprotein LbcA to degrade cell wall hydrolases. Here, we investigated if the C-termini  
33 of two non-homologous CtpA substrates are important for their degradation. We  
34 determined that these substrates have extended C-termini, compared to their closest *E.*  
35 *coli* homologs. Removing seven amino acids from these extensions was sufficient to  
36 inhibit their degradation by CtpA both *in vivo* and *in vitro*. Degradation of one truncated  
37 substrate was restored by adding the C-terminus from the other, but not by adding an  
38 unrelated sequence. However, modification of the C-terminus of non-substrates, by  
39 adding the C-terminal amino acids from a substrate, did not cause their degradation by  
40 CtpA. Therefore, the C-termini of CtpA substrates are required but not sufficient for  
41 degradation. Although C-terminal truncated substrates were not degraded, they still  
42 associated with the LbcA•CtpA complex *in vivo*. Therefore, degradation of a protein by  
43 CtpA requires a C-terminal-independent interaction with the LbcA•CtpA complex,  
44 followed by C-terminal-dependent degradation, perhaps because CtpA must initiate  
45 cleavage at a specific C-terminal site.

46

47 **IMPORTANCE**

48 Carboxyl-terminal processing proteases (CTPs) are found in all three domains of life,  
49 but exactly how they work is poorly understood, including how they recognize  
50 substrates. Bacterial CTPs have been associated with virulence, including CtpA of  
51 *Pseudomonas aeruginosa*, which works in complex with the outer membrane lipoprotein  
52 LbcA to degrade potentially dangerous peptidoglycan hydrolases. We report an  
53 important advance by revealing that degradation by CtpA requires at least two  
54 separable phenomena, and that one of them depends on information encoded in the  
55 substrate C-terminus. A C-terminal-independent association with the LbcA•CtpA  
56 complex is followed by C-terminal-dependent cleavage by CtpA. Increased  
57 understanding of how CTPs target proteins is significant, due to their links to virulence,  
58 peptidoglycan remodeling, and other important processes.

59

## 60 INTRODUCTION

61 *Pseudomonas aeruginosa* is a widespread Gram-negative bacterium and a frequent  
62 cause of serious opportunistic human infections (1). Like all bacterial pathogens, many  
63 *P. aeruginosa* virulence factors are assembled in its cell envelope, or must pass through  
64 the envelope on their way out of the bacterial cell. These include type II and III secretion  
65 systems, their exported substrates, pili, and the extracellular polysaccharide alginate,  
66 which plays an important role during chronic lung infections of cystic fibrosis patients (1-  
67 3). The successful production and function of these virulence factors is presumably  
68 impacted by the normal physiological functions that produce, maintain and remodel the  
69 major components of the cell envelope (4).

70 Proteolysis is an important process in the bacterial cell envelope. It ranges from  
71 discrete processing events during protein export, assembly, and signal transduction, to  
72 the complete degradation of proteins, which is especially important for misfolded or  
73 otherwise dangerous proteins (e.g. 5, 6, 7). One family of proteases found in the  
74 bacterial cell envelope is the carboxyl-terminal processing proteases (CTPs), which also  
75 occur in archaea and eukaryotes. These enzymes belong to the S41 family of serine  
76 proteases, and they can cleave a substrate once for processing, or degrade them  
77 completely (8-11). The CTP name is derived from early findings that these proteases  
78 often cleave close to the C-terminus of their substrate. However, at least one member of  
79 the CTP family in *Xanthomonas campestris* has now been shown to cleave close to the  
80 N-terminus of its substrate (12).

81 Recently, it has emerged that one role played by Gram-negative bacterial CTPs  
82 is to control potentially dangerous cell wall cross-link hydrolases by degrading them (13,

83 14). This is likely to be a widespread phenomenon, because it occurs in the divergent  
84 species *Escherichia coli* and *P. aeruginosa*. In *E. coli*, the Prc protease degrades the  
85 cell wall cross-link hydrolase MepS, and in *P. aeruginosa* CtpA degrades at least four  
86 predicted cell wall cross-link hydrolases (13, 14). Both of these CTPs form complexes  
87 with an outer membrane lipoprotein that is required for their proteolytic function, Nlpl in  
88 *E. coli* and LbcA in *P. aeruginosa* (13, 14). However, despite their obvious similarities,  
89 Prc and CtpA are not orthologs. Prc is much larger than CtpA, and it is a member of the  
90 CTP-1 subfamily, whereas CtpA is in the divergent CTP-3 subfamily (15-17).  
91 Furthermore, although their lipoprotein binding partners Nlpl and LbcA both contain the  
92 short, degenerate tetratricopeptide repeat motifs, they do not share obvious primary  
93 sequence similarity and are very different in size.

94 Exactly how CTPs recognize their substrates is unclear. In *E. coli*, Prc has been  
95 suggested to target proteins with non-polar and/or structurally unconstrained C-termini  
96 (10, 18-20). However, nothing is known about whether or not the C-terminus of a  
97 substrate is important during cleavage by the CtpA protease of *P. aeruginosa*. The  
98 significant differences between Prc and CtpA mean that what is true for Prc cannot be  
99 assumed to be true for CtpA. In particular, they might not share similar substrate  
100 recognition requirements. Indeed, the substrates of CtpA do not have non-polar C-  
101 termini (14). Knowing the features required for substrate cleavage is an important step  
102 towards understanding how CtpA-dependent proteolysis is controlled in *P. aeruginosa*.  
103 Therefore, we have investigated the role of the substrate C-terminus. Our results reveal  
104 that the extreme C-terminus is a critical determinant of degradation both *in vivo* and *in*  
105 *vitro*, and that the C-termini of two unrelated substrates are functionally interchangeable

106 for degradation. However, the C-terminal motif is not sufficient for degradation, which  
107 suggests that it is only one of two or more checkpoints that determine if a protein will be  
108 degraded by CtpA.

109

## 110 RESULTS

111 **Truncation of the C-terminus protects substrates from degradation by CtpA *in***  
112 ***vivo*.** The first CtpA substrate to be discovered was PA0667, which we named MepM  
113 due to its homology with the *E. coli* MepM peptidoglycan cross-link hydrolase (14, 21).  
114 *P. aeruginosa* MepM has a short C-terminal extension that is not present in *E. coli*  
115 MepM, but is conserved in other *Pseudomonas* species, all of which also have CtpA  
116 (Fig. 1A). We hypothesized that this extension might be important for CtpA-dependent  
117 degradation. To test this, we constructed *araBp-mepM* expression plasmids encoding  
118 MepM with C-terminal truncations and determined their steady state levels in *ctpA*<sup>+</sup> and  
119  $\Delta$ *ctpA* strains. C-terminal truncation increased the amount of MepM in *ctpA*<sup>+</sup> cells,  
120 suggesting protection from CtpA-dependent degradation (Fig. 1C). The  $\Delta$ 6 truncation  
121 (C-terminal six amino acids removed) reproducibly had a slightly higher level in  $\Delta$ *ctpA*  
122 compared to *ctpA*<sup>+</sup> strains, whereas longer truncations ( $\Delta$ 7- $\Delta$ 9) consistently had a  
123 similar level in both strains (Fig. 1C and data not shown). The  $\Delta$ 8 truncation reduced the  
124 amount of MepM even in the  $\Delta$ *ctpA* strain, perhaps due to CtpA-independent  
125 destabilization (Fig. 1C and data not shown). Therefore, from all these data we  
126 concluded that removing approximately seven C-terminal amino acids was sufficient to  
127 protect MepM from CtpA-dependent degradation *in vivo*, without otherwise destabilizing  
128 the protein.

129 MepM and another CtpA substrate, PA4404, are both members of the LytM/M23  
130 peptidase family. However, the two other known substrates, PA1198 and PA1199, are  
131 in the NlpC/P60 peptidase family (14). PA1198 and PA1199 are over 50% identical to  
132 each other, and homologous to *E. coli* MepS. An alignment of *E. coli* MepS with PA1198

133 and PA1199 revealed that the *P. aeruginosa* proteins have extended C-termini (Fig.  
134 1B). Therefore, we expanded our analysis to include one of these NlpC/P60 family  
135 substrates, PA1199. As with MepM, C-terminal truncations increased the amount of  
136 PA1199 in *ctpA*<sup>+</sup> cells, suggesting protection from CtpA-dependent degradation (Fig.  
137 1D). In this case, removing five C-terminal amino acids appeared sufficient to protect  
138 PA1199 from CtpA-dependent degradation *in vivo*, without otherwise destabilizing the  
139 protein. Together, all of these data suggest that the C-termini of MepM and PA1199  
140 contain information that is needed for their degradation by CtpA *in vivo*.

141 **The C-termini of MepM and PA1199 are interchangeable for CtpA-**  
142 **dependent degradation.** To extend our investigation we focused on the  $\Delta 7$  truncations  
143 of MepM and PA1199, because both rendered the proteins equally abundant in *ctpA*<sup>+</sup>  
144 and  $\Delta ctpA$  strains (Fig. 1). The amino acids removed from each protein are not  
145 obviously similar (LALNKQR for MepM, and SPLARVP for PA1199, Fig. 1).  
146 Nevertheless, we tested our conclusion that they contain specific information required  
147 for CtpA-dependent degradation, by exchanging them.

148 MepM- $\Delta 7$  was similarly abundant in *ctpA*<sup>+</sup> and  $\Delta ctpA$  strains as seen previously  
149 (Figs. 1 and 2). However, when the C-terminal seven amino acids of PA1199 were  
150 added onto the C-terminus of MepM- $\Delta 7$  it behaved indistinguishably from wild type  
151 MepM, suggesting that its degradation by CtpA was restored (Fig. 2A). Similarly,  
152 addition of the C-terminal seven amino acids of MepM onto the end of PA1199- $\Delta 7$  made  
153 it behave similarly to wild type PA1199 (Fig. 2B). These experiments further support the  
154 conclusion that the C-termini of CtpA substrates are required for their degradation *in*  
155 *vivo*, and also show that they can be exchanged between two different substrates.



156           **Restoring the length of truncated substrates is not sufficient for CtpA-**  
157 **dependent degradation.** CtpA-dependent degradation of two substrates truncated by  
158 seven amino acids was restored by adding back seven amino acids from a different  
159 substrate (Fig. 2). This raised the question of whether it is the length of the substrates  
160 that is critical, or if their C-termini contain sequence-dependent information. To  
161 distinguish between these possibilities, we generated a seven amino acid sequence  
162 randomly, AGEAGHL, and added it to the C-termini of the MepM- $\Delta$ 7 and PA1199- $\Delta$ 7  
163 proteins. In contrast to the C-terminal swaps, adding these random seven amino acids  
164 to the truncated MepM and PA1199 proteins did not reduce their levels in a *ctpA*<sup>+</sup> strain  
165 compared to a  $\Delta$ *ctpA* strain (Fig, 3). Therefore, the C-terminal sequences of MepM and  
166 PA1199 contain sequence-specific information important for degradation by CtpA.

167           **The C-terminal motif of a CtpA substrate is not sufficient for CtpA-**  
168 **dependent degradation.** In *E. coli*, it was reported that adding the C-terminal five  
169 amino acids of a Prc substrate onto the C-terminus of a non-substrate rendered it  
170 cleavable by Prc *in vivo* and *in vitro* (22). Our findings suggested that the C-terminal  
171 amino acids of CtpA substrates are also required for degradation, but they did not  
172 address if they are sufficient for degradation. Therefore, we tested this possibility next.

173           Besides the CtpA substrates MepM and PA4404, *P. aeruginosa* has a third  
174 member of the LytM/M23 peptidase family in its cell envelope that is predicted to be  
175 catalytically active, PA3787. However, PA3787 is not a CtpA substrate *in vivo* or *in vitro*  
176 (14). To test if the C-terminal amino acids of a substrate are sufficient for CtpA-  
177 dependent degradation, we added the C-terminal seven amino acids of MepM onto the  
178 C-terminus of PA3787. This hybrid protein was slightly less abundant than wild type

179 PA3787 in both *ctpA*<sup>+</sup> and  $\Delta$ *ctpA* cells (Fig. 3A). However, it did not accumulate in a  
180  $\Delta$ *ctpA* strain compared to a *ctpA*<sup>+</sup> strain. Therefore, the addition of the C-terminal seven  
181 amino acids from MepM did not make the related PA3787 a CtpA substrate *in vivo*.

182 PA3787 lacks the LysM peptidoglycan-binding domain that is found in MepM,  
183 making it a shorter protein with only 18% overall identity to MepM. Therefore, to test our  
184 conclusion more rigorously we extended our experiments to include *E. coli* MepM,  
185 which in comparison to PA3787, is a closer homolog of *P. aeruginosa* MepM. *P.*  
186 *aeruginosa* and *E. coli* MepM are similar in length, have the same domain organization,  
187 and are approximately 30% identical (not shown). Both have LysM peptidoglycan-  
188 binding and LytM/M23 peptidase domains, and their homology is distributed throughout  
189 their length (not shown). However, the C-terminal KKTKLALNKQR motif of *P.*  
190 *aeruginosa* MepM is absent from *E. coli* MepM (Fig. 1A). To further test if the C-terminal  
191 amino acids are sufficient for degradation by CtpA, we added the entire  
192 KKTKLALNKQR sequence onto the C-terminus of *E. coli* MepM. This was followed by a  
193 FLAG-tag sequence, because we did not have a reagent to detect *E. coli* MepM, and  
194 because a C-terminal FLAG tag does not affect the degradation of any CtpA substrate,  
195 including MepM (14). As expected, *P. aeruginosa* MepM-FLAG was undetectable in a  
196 *ctpA*<sup>+</sup> strain, but abundant in a  $\Delta$ *ctpA* mutant, consistent with its degradation by CtpA as  
197 in our previous report (Fig. 3B; ref. 14). In contrast, *E. coli* MepM-FLAG was equally  
198 abundant in both strains, suggesting that it is not degraded by CtpA. Furthermore, *E.*  
199 *coli* MepM-FLAG with the KKTKLALNKQR motif added was also equally abundant in  
200 both strains. Therefore, these experiments further support the conclusion that the C-  
201 terminus of a CtpA substrate is required, but not sufficient, for degradation by CtpA *in*

202 *vivo*.

203 **Truncation of the C-terminus protects substrates from degradation by CtpA**

204 *in vitro*. It was possible that the C-terminal truncation mutations of MepM and PA1199  
205 had an indirect effect *in vivo*, rather than rendering the proteins resistant to direct  
206 degradation by CtpA. One example would be if their localization was affected so that  
207 they became separated from CtpA. Therefore, we used an *in vitro* proteolysis assay to  
208 test our conclusion that the C-terminal amino acids are required for direct degradation  
209 by CtpA. The CtpA-binding partner LbcA, which increases CtpA activity, CtpA itself, and  
210 an inactive CtpA-S302A control (catalytic serine changed to alanine) were purified with  
211 C-terminal His<sub>6</sub> tags, as before (14). However, MepM, MepM- $\Delta$ 7, PA1199 and PA1199-  
212  $\Delta$ 7 were purified with N-terminal His<sub>6</sub> tags, so that their C-termini were unaltered, and  
213 identical to the proteins we had studied in the *in vivo* experiments.

214 When MepM was incubated with CtpA and LbcA, it was mostly degraded after  
215 one hour, and completely degraded after three hours (Fig. 5A). In contrast, MepM- $\Delta$ 7  
216 was resistant to degradation at both timepoints, with no degradation evident after 1  
217 hour, and only slight degradation after three hours. PA1199 was degraded more quickly  
218 than MepM *in vitro*, such that it was degraded completely after 30 minutes (Fig. 5B).  
219 However, the PA1199- $\Delta$ 7 protein was completely resistant to degradation after one hour  
220 (Fig. 5B), and we have also found that it remains resistant to degradation after three  
221 hours (data not shown). These experiments suggest that the C-terminal seven amino  
222 acids of MepM and PA1199 are required for their direct degradation by the LbcA•CtpA  
223 complex.

224 **Truncation of the C-terminus does not prevent substrates from associating**

225 **with the LbcA•CtpA complex *in vivo*.** MepM was discovered as a CtpA substrate  
226 because it copurified with the proteolytically inactive LbcA•CtpA-S302A complex after *in*  
227 *vivo* formaldehyde cross-linking (14). We considered the possibility that the truncated  
228 substrates might be resistant to degradation because they can no longer associate with  
229 the LbcA•CtpA complex. Alternatively, the truncated substrates might still associate with  
230 LbcA•CtpA, but their degradation is inhibited for another reason, perhaps because CtpA  
231 normally initiates cleavage from a missing C-terminal motif. To distinguish between  
232 these possibilities, we repeated the procedure that discovered MepM (14), to test if the  
233 MepM- $\Delta$ 7 and PA1199- $\Delta$ 7 proteins were still trapped by an inactive LbcA•CtpA-S302A  
234 complex.

235  $\Delta$ *ctpA*  $\Delta$ *mepM* strains contained a plasmid encoding CtpA-S302A-His<sub>6</sub>, and a  
236 second plasmid encoding LbcA-FLAG and either MepM or MepM- $\Delta$ 7. The LbcA•CtpA-  
237 S302A complex was purified using nickel agarose first to capture CtpA-S302A-His<sub>6</sub>,  
238 followed by anti-FLAG affinity gel to capture LbcA-FLAG. Coomassie staining of the  
239 samples after SDS-PAGE revealed that LbcA and CtpA-S302A purified abundantly, as  
240 expected (Fig. 6A). Confirmation that a LbcA•CtpA-S302A complex was isolated was  
241 provided by negative control purifications from strains that did not encode LbcA-FLAG,  
242 but still encoded CtpA-S302A-His<sub>6</sub>. Neither LbcA or CtpA-S302A purified abundantly  
243 from these controls (Fig. 6). Immunoblot analysis showed that both MepM and MepM-  
244  $\Delta$ 7 were captured with the LbcA•CtpA-S302A complex, but not in the negative controls  
245 (Fig. 6A). A similar experiment to analyze PA1199 revealed that both PA1199 and  
246 PA1199- $\Delta$ 7 were captured by the LbcA•CtpA-S302A complex as well (Fig. 6B). These  
247 results suggest that removal of the C-terminal seven amino acids from MepM or

248 PA1199 does not significantly affect their association with the LbcA•CtpA complex *in*  
249 *vivo*. Therefore, it is likely that the C-termini of these substrates are required to initiate  
250 their degradation after they have been engaged by the proteolytic complex (see  
251 Discussion).

252 **A conserved amino acid at the -5 position is not essential for CtpA-**  
253 **dependent degradation.** The sequence, charge, or hydrophobicity of the C-terminal  
254 amino acids of MepM and PA1199 do not have obvious similarity. However, an  
255 alignment of the C-terminal seven amino acids of all four CtpA substrates revealed that  
256 three of them have leucine as the fifth amino acid from their C-terminus (referred to as  
257 the -5 position) and the other one, PA4404, has alanine (Fig. 7A). These four CtpA  
258 substrates are LytM/M23 or NlpC/P60 peptidase family members. Two other predicted  
259 peptidoglycan cross-link hydrolase members of these families are not CtpA substrates,  
260 PA3787 and PA3472 (14). Neither of these has leucine or alanine at the -5 position (Fig.  
261 7A). In ongoing work in our laboratory, we have identified a fifth CtpA substrate  
262 preliminarily, which also has leucine at the -5 position (D. Chakraborty, A. G.  
263 Sommerfield and A. J. Darwin, unpublished data). This means that three or four CtpA  
264 substrates have leucine at position -5 and one has alanine, whereas neither of two  
265 related non-substrates share this property. Therefore, we tested if the leucine at position  
266 -5 of MepM or PA1199 was important for their degradation by CtpA.

267 The non-substrate PA3472 has serine at the -5 position (Fig. 7A). Therefore, we  
268 made the conservative alanine to serine substitution at the -5 positions of MepM and  
269 PA1199. These substitutions had different effects on the steady state levels of the  
270 proteins. The MepM L475S mutant behaved indistinguishably from wild type MepM,

271 showing that the leucine at position -5 is not required for its degradation by CtpA (Fig.  
272 7B). In contrast, the PA1199 L173S mutant behaved indistinguishably from the PA1199-  
273  $\Delta 7$  truncation mutant, showing that its leucine at the -5 position is important for CtpA-  
274 dependent degradation. Taken together, these results suggest that while individual  
275 amino acids can influence CtpA-dependent destabilization *in vivo*, a conserved position-  
276 specific sequence signature for degradation is unlikely (see Discussion).

277

## 278 **DISCUSSION**

279 CtpA is essential for *P. aeruginosa* T3SS function, for virulence in a mouse model of  
280 acute pneumonia, and it affects surface attachment (14, 17). These phenotypes are  
281 probably linked to the cell wall, because CtpA degrades peptidoglycan cross-link  
282 hydrolases (14). This means that CtpA is critical for fundamental cell envelope  
283 physiology, and for the ability of *P. aeruginosa* to cause disease. Therefore, it is  
284 important to understand all aspects of CtpA function, including the features of a protein  
285 that make it susceptible to CtpA-dependent proteolysis. The carboxyl-terminal  
286 processing protease (CTP) family was named because the first members studied were  
287 found to cleave close to the C-terminus of their substrates, either as a processing event,  
288 or to initiate degradation (e.g. 9, 10, 23). This suggests that substrate C-termini might  
289 contain information that is recognized by a CTP. Indeed, some CTPs, including *E. coli*  
290 Prc, have been proposed to target proteins with non-polar and/or structurally  
291 unconstrained C-termini (10, 18-20, 22, 24). However, the role of the substrate C-  
292 terminus has not been studied for most CTPs, and the same rules are unlikely to apply  
293 to all of them. In fact, *Xanthomonas campestris* Prc cleaves close to the N-terminus of a  
294 transmembrane substrate, and cannot rely on recognition features in the C-terminus,  
295 which is physically separated from Prc by the cytoplasmic membrane (12).

296 We have investigated if the C-termini of CtpA substrates play a role in their  
297 degradation, using one substrate in the LytM/M23 peptidase family (MepM), and one in  
298 the NlpC/P60 family (PA1199), as model substrates. Despite the fact that MepM and  
299 PA1199 are not homologous, in both cases their C-terminal amino acids were essential  
300 for degradation (Figs. 1 and 5). The C-terminal seven amino acids of MepM and

301 PA1199 could also be exchanged without affecting their CtpA-dependent degradation *in*  
302 *vivo*, whereas substitution with an unrelated seven amino acids rendered the proteins  
303 resistant to degradation (Figs. 2-3). This suggests that the C-termini of CtpA substrates  
304 contain specific information required for degradation. However, the sequences of the  
305 seven C-terminal amino acids of MepM and PA1199 are not similar, and a comparison  
306 of all four CtpA substrates also failed to reveal obvious common C-terminal features  
307 (Fig. 7A). Notably, they are not predominantly non-polar, which is a feature that  
308 emerged from early research as something common amongst *E. coli* Prc substrates  
309 (20). We did notice that CtpA substrates have leucine or alanine at the -5 position,  
310 whereas two non-substrates in the LytM/M23 and NlpC/P60 peptidase families do not  
311 (Fig. 7A). However, although changing this leucine to serine protected PA1199 from  
312 CtpA-dependent degradation, it did not protect MepM (Fig. 7). From all of these  
313 observations, we conclude that the information required for CtpA-dependent  
314 degradation is not a conserved C-terminal amino acid sequence motif, but perhaps  
315 another property such as a structural feature.

316 An early study of *E. coli* Prc concluded that the C-terminal five amino acids of a  
317 substrate were sufficient for cleavage, because when added onto the C-terminus of a  
318 non-substrate it was cleaved by Prc (22). However, the addition of the *P. aeruginosa*  
319 MepM C-terminus onto two other LytM/M23 peptidases did not make either of them a  
320 CtpA substrate (Fig. 4). Therefore, the C-terminus of CtpA substrates is not sufficient for  
321 degradation. Later work on *E. coli* Prc revealed that it forms a complex with the outer  
322 membrane lipoprotein Nlpl, which promotes Prc-dependent degradation of MepS *in vivo*  
323 and *in vitro* (13). Protein interaction and structure-function analysis suggested that Nlpl



324 binds to Prc and MepS independently, acting as a scaffold to bring protease and  
325 substrate together (10, 13). CtpA also has an outer membrane lipoprotein binding  
326 partner, LbcA, which promotes the degradation of all four CtpA substrates *in vivo* and *in*  
327 *vitro* (14). LbcA and Nlpl are not homologous, but both contain tetratricopeptide repeats  
328 (TPR) that mediate the formation of multiprotein complexes (25). We have evidence that  
329 LbcA also acts as a scaffold, binding CtpA and its substrates independently (D.  
330 Chakraborty and A. J. Darwin, unpublished data). The MepM and PA1199 C-terminal  
331 truncation mutants still associated with the LbcA•CtpA complex *in vivo* (Fig. 6). This  
332 suggests that substrate C-termini are not involved in the association with LbcA.  
333 Therefore, the C-terminus of MepM is probably insufficient for degradation, because  
334 when transplanted onto a non-substrate it cannot provide a required association with  
335 the LbcA•CtpA complex. Interestingly, recent work indicated that cleavage of one  
336 proposed substrate of *E. coli* Prc, FtsI, is not helped by the Nlpl binding partner of Prc *in*  
337 *vitro* (26). If something similar occurs *in vivo*, it would mean that Nlpl promotes the  
338 cleavage of some substrates (MepS), but is not required for the cleavage of others  
339 (FtsI). That might explain why the transplantation of a Prc substrate C-terminus onto at  
340 least one non-substrate was sufficient for its degradation (22).

341 *P. aeruginosa* has a second CTP that is a close homolog of *E. coli* Prc, and has  
342 been named both Prc and AlgO. Early in this study we made an interesting observation  
343 about *P. aeruginosa* Prc that we are pursuing separately. When we began to analyze  
344 PA1199, some of truncation mutants had significantly reduced abundance in a  $\Delta ctpA$   
345 strain compared to the wild type protein (S. Chung and A. J. Darwin, unpublished data).  
346 *E. coli* Prc has been implicated in degrading proteins with aberrant C-termini (20, 27).

347 Therefore, we reasoned that *P. aeruginosa* Prc might cleave some truncated PA1199  
348 proteins due to their altered C-termini. In support of this, the abundance of the truncated  
349 PA1199 proteins was indistinguishable from full length PA1199 in  $\Delta ctpA \Delta prc$  strains (S.  
350 Chung and A. J. Darwin, unpublished data). For this reason, all of the *in vivo* analysis of  
351 PA1199 and its derivatives was done by comparing their abundance in  $\Delta prc ctpA^+$  and  
352  $\Delta prc \Delta ctpA$  strains, to eliminate any interference from Prc. Nevertheless, this suggests  
353 that *P. aeruginosa* Prc might play a role in protein quality control, which is consistent  
354 with the suggestion that Prc cleaves C-terminal truncated forms of MucA that arise in  
355 cystic fibrosis patients (28, 29). However, Prc does not degrade all proteins with  
356 aberrant C-termini because we did not detect any influence of Prc on truncated MepM  
357 proteins (S. Chung and A. J. Darwin, unpublished data).

358 Structural analysis of the *E. coli* NlpI•Prc complex, and a docking model of the C-  
359 terminal 12 amino acid peptide of its MepS substrate, suggests that the substrate C-  
360 terminus is bound by the PDZ domain of Prc (10). The Prc PDZ domain was proposed  
361 to recognize substrate C-termini with low specificity, because Prc degrades MepS with  
362 or without a C-terminal His<sub>6</sub> tag, and will also degrade lysozyme *in vitro* if a disulfide  
363 bond in its C-terminus is broken by reduction (10). In contrast, our analysis suggests  
364 that there is specific recognition of the C-termini of CtpA substrates. However, all four  
365 CtpA substrates are still degraded *in vivo* when a FLAG tag is added onto their C-  
366 terminus, and *in vitro* with C-terminal His<sub>6</sub> tags (14). This can still be reconciled with our  
367 conclusion that substrate C-termini are recognized specifically. We hypothesize that the  
368 native C-terminal amino acids of CtpA substrates can still make a required specific  
369 interaction with CtpA even if non-native amino acids have been added onto them.

370           In summary, this work has shown that the C-termini of *P. aeruginosa* CtpA  
371 substrates contain specific information required, but not sufficient, for degradation. We  
372 hypothesize that the cleavage of a protein by CtpA requires at least two phenomena: (1)  
373 association of the substrate with the LbcA•CtpA complex (most likely with LbcA) and (2)  
374 a specific recognition of the substrate C-terminus by CtpA. However, any interaction  
375 with LbcA might have to occur in a specific way, perhaps with one or more specific TPR  
376 motif(s), of the eleven that are present in LbcA. This is because we have evidence that  
377 LbcA might associate with some proteins that are not cleaved by CtpA, including  
378 PA3787 (ref. 14 and D. Chakraborty and A. J. Darwin, unpublished data). The Nlpl  
379 partner of *E. coli* Prc has also been proposed to interact with some non-Prc substrates  
380 (30). Perhaps CtpA substrates and non-substrates interact differently with LbcA,  
381 possibly engaging different TPR motifs. Regardless, specific engagement of a substrate  
382 by LbcA, and then recognition of its C-terminus by CtpA, would be followed by the first  
383 cleavage event. Degradation might then proceed in a non-specific manner that does not  
384 require specific recognition of the new C-terminus generated after this first cleavage  
385 event. This might occur similarly to the lever-like mechanism proposed for *E. coli* Prc,  
386 which feeds the substrate into the Prc active site in a C- to N-terminal direction after  
387 each cleavage event (10). However, CtpA and Prc are in different CTP subfamilies and  
388 their lipoprotein partners are not homologous. Therefore, the details of the organization  
389 and function of the LbcA•CtpA complex are likely to diverge from those of *E. coli*  
390 Nlpl•CtpA. The goal of future work will be to uncover exactly what those details are.

391

## 392 MATERIALS AND METHODS

393

394 **Bacterial strains, plasmids and routine growth.** Strains and plasmids are listed in  
395 Table 1. Bacteria were grown routinely in Luria-Bertani (LB) broth, composed of 1%  
396 (w/v) Tryptone, 0.5% (w/v) yeast extract and 1% (w/v) NaCl, or on LB agar, at 30°C or  
397 37°C. *P. aeruginosa* was occasionally grown on Vogel-Bonner minimal agar (31).

398 **Strain constructions.** To construct  $\Delta prc$  and  $\Delta(PA1198-PA1199)$  in frame  
399 deletion mutants, two fragments of ~ 0.5 kb each corresponding to the regions flanking  
400 the deletion site were amplified by PCR and cloned into pEX18Ap. The plasmids were  
401 integrated into the *P. aeruginosa* chromosome after conjugation from *E. coli* strain  
402 SM10 (32) and sucrose resistant, carbenicillin sensitive segregants were isolated on LB  
403 agar containing 10% sucrose. Deletions were verified by genomic PCR analysis.

404 **Plasmid constructions.** *araBp* expression plasmids encoding MepM, PA1199 or  
405 PA3787 were constructed by amplifying the genes from *P. aeruginosa* chromosomal  
406 DNA using one primer that annealed ~ 30 bp upstream of the start codon and a second  
407 primer that annealed immediately downstream of the stop codon. Plasmids encoding C-  
408 terminal truncated derivatives were constructed similarly, except that the downstream  
409 primers annealed within the gene and incorporated a premature stop codon. Plasmids  
410 encoding MepM or PA1199 with their C-terminal seven amino acids exchanged, or  
411 replaced by AGEAGHL, were constructed using downstream primers that annealed 21  
412 bp upstream of the stop codon and incorporated a region encoding the final seven  
413 amino acids of MepM, PA1199, or the AGEAGHL sequence, followed by a stop codon.  
414 To construct a plasmid encoding PA3787 with the C-terminal seven amino acids of

415 MepM added, the downstream primer annealed immediately upstream of the PA3787  
416 stop codon and incorporated a region encoding the C-terminus of MepM followed by a  
417 stop codon. Plasmids encoding *E. coli* MepM-FLAG were constructed by amplifying  
418 *mepM* from *E. coli* strain MG1655 chromosomal DNA. The forward primer annealed  
419 immediately upstream of the start codon and incorporated the ribosome binding site  
420 from pQE-30, and the reverse primer annealed immediately upstream of the stop codon  
421 and incorporated a region encoding the FLAG tag only, or the C-terminal eleven amino  
422 acids of *P. aeruginosa* MepM followed by a FLAG tag, and a stop codon. In all cases,  
423 the amplified fragments were cloned into pHERD20T using restriction sites added to the  
424 fragments by the amplification primers.

425 For the LbcA•CtpA-S302A trap experiments, *araBp* expression plasmids were  
426 constructed to encode MepM or PA1199 full length or C-terminal truncated proteins, as  
427 well as LbcA-FLAG. *lbcA* was amplified from *P. aeruginosa* chromosomal DNA using a  
428 primer that annealed ~ 40 bp upstream of the start codon and a primer that annealed  
429 immediately upstream of the stop codon and incorporated a region encoding the FLAG  
430 tag followed by a stop codon. This was cloned as an XbaI-HindIII fragment (restriction  
431 sites incorporated by the amplification primers) immediately downstream of the *mepM*  
432 or PA1199 genes in the expression plasmids described above.

433 pET-24b(+) derivatives used for overproduction and purification of LbcA-His<sub>6</sub>,  
434 CtpA-His<sub>6</sub> and CtpA-S302A-His<sub>6</sub> were described previously (14, 17). For overproduction  
435 and purification of His<sub>6</sub>-MepM or His<sub>6</sub>-PA1199 full length and C-terminal truncated  
436 proteins, the genes were amplified without their predicted N-terminal signal sequences  
437 and cloned into pQE-30 as BamHI-HindIII fragments.

438           **Determination of protein abundance *in vivo*.** Saturated cultures were diluted  
439 into 5 ml of LB broth, containing 150 µg/ml carbenicillin and 0.02% (w/v) arabinose, in  
440 18 mm diameter test tubes so that the initial OD 600 nm was 0.05. The cultures were  
441 grown on a roller drum at 37°C for 5 h. Cells were collected by centrifugation and  
442 resuspended in SDS-PAGE sample buffer at equal concentrations (based on the culture  
443 OD 600 nm) before being analyzed by immunoblot.

444           **Polyclonal antisera and immunoblotting.** Proteins were separated by SDS-  
445 PAGE and transferred to a nitrocellulose membrane by semi-dry electroblotting. For  
446 analysis of total cell lysates, approximately equal loading and transfer was confirmed by  
447 total protein staining of the nitrocellulose membrane with Ponceau S (Amresco).  
448 Chemiluminescent detection followed incubation with polyclonal antiserum or  
449 monoclonal antibody, then goat anti-rabbit IgG (Sigma) or goat anti-mouse IgG (Sigma)  
450 horseradish peroxidase conjugates used at the manufacturers recommended dilution.  
451 The primary anti-FLAG M2 (Sigma) antibody was diluted 5,000-fold, and all polyclonal  
452 antisera used here have been described previously (14).

453           **Protein purification and *in vitro* proteolysis assay.** LbcA-His<sub>6</sub>, CtpA-His<sub>6</sub> and  
454 CtpA-S302A-His<sub>6</sub> were encoded by pET-24b(+) derivatives in *E. coli* ER2566 (NEB).  
455 His<sub>6</sub>-MepM and His<sub>6</sub>-PA1199 full length and C-terminal truncated proteins were  
456 encoded by pQE-30 derivatives in *E. coli* M15 containing plasmid pREP4 to produce the  
457 LacI repressor (Qiagen). These strains were grown in 1L LB broth at 37°C with aeration  
458 until the OD 600 nm was 0.6-1.0. Protein production was induced by adding 1 mM IPTG  
459 and incubating for 3-4 h at 37°C (LbcA-His<sub>6</sub>, CtpA-His<sub>6</sub> and CtpA-S302A-His<sub>6</sub>) or at  
460 30°C (His<sub>6</sub>-MepM and His<sub>6</sub>-PA1199), with aeration. Proteins were purified under native

461 conditions by NTA agarose affinity chromatography in buffer containing 50 mM  
462  $\text{NaH}_2\text{PO}_4$  and 300 mM NaCl, as recommended by the manufacturer (Qiagen). LbcA-  
463 His<sub>6</sub>, His<sub>6</sub>-MepM and His<sub>6</sub>-PA1199 proteins were eluted in fractions using 50 mM  
464  $\text{NaH}_2\text{PO}_4$  and 300 mM NaCl buffer containing increasing concentrations of imidazole  
465 (50 - 250 mM). Samples of each fraction were separated by SDS-PAGE, stained with  
466 ProtoBlue Safe (National Diagnostics), and 2-3 fractions judged to have the highest  
467 purity were combined, supplemented with 10% (w/v) glycerol and stored at -70°C. The  
468 same fractions were used for His<sub>6</sub>-MepM and for His<sub>6</sub>-MepM- $\Delta 7$ , and the same fractions  
469 were used for His<sub>6</sub>-PA1199 and for His<sub>6</sub>-PA1199- $\Delta 7$ . CtpA-His<sub>6</sub> and CtpA-S302A-His<sub>6</sub>  
470 were eluted similarly, but after combining fractions the proteins were concentrated ~ 10-  
471 fold using Amicon Ultra-4 centrifuge filter devices (10 kDa cutoff), and then  
472 supplemented with 50% Protein Stabilizing Cocktail (ThermoFisher Scientific) before  
473 storing at -70°C. All *In vitro* proteolysis reactions contained approximately 2  $\mu\text{M}$  of LbcA  
474 and CtpA or CtpA-S302A. MepM proteins were also used at 2  $\mu\text{M}$ , but the smaller  
475 PA1199 proteins were used at approximately 15  $\mu\text{M}$  to facilitate visualization after  
476 staining. Reactions were incubated at 37°C for 0.5 – 3 h, terminated by adding SDS-  
477 PAGE sample buffer and boiling, separated by SDS-PAGE, and stained with ProtoBlue  
478 Safe (National Diagnostics).

479 **Tandem affinity purification LbcA-FLAG•CtpA-S302A-His<sub>6</sub> complex.** Strains  
480 were grown to saturation, diluted to an OD 600nm of 0.05 in 400 ml of LB broth  
481 containing 5 mM EGTA, and shaken at 200 rpm for 2.5 h at 37°C. The cultures were  
482 supplemented with 0.02% (w/v) arabinose and 1 mM IPTG and shaken at 200 rpm for a  
483 further 3 h at 37°C. Cells from the equivalent of 200 ml of culture at OD 600nm of 1

484 were collected by centrifugation. The pellet was washed with cold 10 mM potassium  
485 phosphate buffer pH 8.0 and resuspended to an OD 600 nm of 5 in the same buffer. 1%  
486 formaldehyde was added followed by incubation at room temperature for 30 min. 0.3 M  
487 Tris-HCl pH 7.5 was added to quench and the cells were collected by centrifugation.  
488 Pellets were resuspended in 3 ml lysis buffer (50 mM Tris-HCl pH 7.5, 150 mM NaCl, 5  
489 mM Imidazole), and Roche complete protease inhibitors (2x concentration), 1 µg/ml  
490 DNaseI, 1 µg/ml RNase, and 1 mg/ml lysozyme were added. Cells were disrupted by  
491 sonication, then 1% *n*-dodecyl β-D-maltoside (DDM) was added followed by incubation  
492 with rotation for 30 min at 4°C. Insoluble material was removed by centrifugation at  
493 13,000 x *g* for 30 min at 4°C. 500 µl of nickel-NTA agarose in lysis buffer was added to  
494 the supernatant, followed by incubation with rotation for 50 min at 4°C. The resin was  
495 collected in a drip column and washed with 8 ml lysis buffer, then 8 ml lysis buffer  
496 containing 20 mM imidazole. Proteins were eluted in 1 ml lysis buffer containing 250  
497 mM imidazole, mixed with 40 µl anti-FLAG M2 agarose resin (Sigma) in TBS (10 mM  
498 Tris-HCl pH 7.5, 150 mM NaCl), and incubated with rotation for 2 h at 4°C. A 1 ml spin  
499 column (Pierce 69725) was used to wash the resin seven times with 500 µl TBS.  
500 Proteins were eluted by adding 100 µl of 200 µg/ml 3xFLAG peptide (Sigma) in TBS  
501 and incubating with rotation at 4°C for 30 min.



502 **ACKNOWLEDGEMENTS**

503           This study was supported by award number R01AI136901 from the National  
504 Institute of Allergy and Infectious Diseases (NIAID). The content is solely the  
505 responsibility of the authors and does not necessarily represent the official views of the  
506 NIAID or the National Institutes of Health.

507           We thank Dolonchapa Chakraborty for providing advice about the protein  
508 purification and *in vitro* proteolysis assays.

509

## 510 REFERENCES

- 511 1. Moore NM, Flaws ML. 2011. Epidemiology and pathogenesis of *Pseudomonas*  
512 *aeruginosa* infections. Clin Lab Sci 24:43-46.
- 513 2. Bleves S, Viarre V, Salacha R, Michel GP, Filloux A, Voulhoux R. 2010. Protein  
514 secretion systems in *Pseudomonas aeruginosa*: A wealth of pathogenic weapons.  
515 Int J Med Microbiol 300:534-543.
- 516 3. Wagner S, Konigsmair L, Lara-Tejero M, Lefebvre M, Marlovits TC, Galan JE. 2010.  
517 Organization and coordinated assembly of the type III secretion export apparatus.  
518 Proc Natl Acad Sci U S A 107:17745-17750.
- 519 4. Dufresne K, Paradis-Bleau C. 2015. Biology and Assembly of the Bacterial  
520 Envelope. Adv Exp Med Biol 883:41-76.
- 521 5. Barchinger SE, Ades SE. 2013. Regulated proteolysis: control of the *Escherichia*  
522 *coli* sigma(E)-dependent cell envelope stress response. Subcell Biochem 66:129-  
523 60.
- 524 6. De Geyter J, Tsirigotaki A, Orfanoudaki G, Zorzini V, Economou A, Karamanou S.  
525 2016. Protein folding in the cell envelope of *Escherichia coli*. Nat Microbiol 1:16107.
- 526 7. Paetzel M. 2019. Bacterial Signal Peptidases. Subcell Biochem 92:187-219.
- 527 8. Che Y, Fu A, Hou X, McDonald K, Buchanan BB, Huang W, Luan S. 2013. C-  
528 terminal processing of reaction center protein D1 is essential for the function and  
529 assembly of photosystem II in *Arabidopsis*. Proc Natl Acad Sci USA 110:16247-52.
- 530 9. Satoh K, Yamamoto Y. 2007. The carboxyl-terminal processing of precursor D1  
531 protein of the photosystem II reaction center. Photosynth Res 94:203-215.
- 532 10. Su MY, Som N, Wu CY, Su SC, Kuo YT, Ke LC, Ho MR, Tzeng SR, Teng CH,  
533 Mengin-Lecreux D, Reddy M, Chang CI. 2017. Structural basis of adaptor-mediated  
534 protein degradation by the tail-specific PDZ-protease Prc. Nat Commun 8:1516.
- 535 11. Hara H, Yamamoto Y, Higashitani A, Suzuki H, Nishimura Y. 1991. Cloning,  
536 mapping, and characterization of the *Escherichia coli* *prc* gene, which is involved in  
537 C-terminal processing of penicillin-binding protein 3. J Bacteriol 173:4799-4813.
- 538 12. Deng CY, Zhang H, Wu Y, Ding LL, Pan Y, Sun ST, Li YJ, Wang L, Qian W. 2018.  
539 Proteolysis of histidine kinase VgrS inhibits its autophosphorylation and promotes  
540 osmotic stress resistance in *Xanthomonas campestris*. Nat Commun 9:4791.
- 541 13. Singh SK, Parveen S, SaiSree L, Reddy M. 2015. Regulated proteolysis of a cross-  
542 link-specific peptidoglycan hydrolase contributes to bacterial morphogenesis. Proc  
543 Natl Acad Sci U S A 112:10956-10961.
- 544 14. Srivastava D, Seo J, Rimal B, Kim SJ, Zhen S, Darwin AJ. 2018. A Proteolytic  
545 Complex Targets Multiple Cell Wall Hydrolases in *Pseudomonas aeruginosa*. MBio  
546 9:pil: e00972-18.
- 547 15. Rawlings ND, Barrett AJ, Bateman A. 2010. MEROPS: the peptidase database.  
548 Nucleic Acids Res 38:D227-33.
- 549 16. Hoge R, Laschinski M, Jaeger KE, Wilhelm S, Rosenau F. 2011. The subcellular  
550 localization of a C-terminal processing protease in *Pseudomonas aeruginosa*.  
551 FEMS Microbiol Lett 316:23-30.
- 552 17. Seo J, Darwin AJ. 2013. The *Pseudomonas aeruginosa* periplasmic protease CtpA  
553 can affect systems that impact its ability to mount both acute and chronic infections.  
554 Infect Immun 81:4561-4570.

- 555 18. Beebe KD, Shin J, Peng J, Chaudhury C, Khera J, Pei D. 2000. Substrate  
556 recognition through a PDZ domain in tail-specific protease. *Biochemistry* 39:3149-  
557 3155.
- 558 19. Keiler KC, Silber KR, Downard KM, Papayannopoulos IA, Biemann K, Sauer RT.  
559 1995. C-terminal specific protein degradation: activity and substrate specificity of the  
560 Tsp protease. *Protein Sci* 4:1507-1515.
- 561 20. Silber KR, Keiler KC, Sauer RT. 1992. Tsp: a tail-specific protease that selectively  
562 degrades proteins with nonpolar C termini. *Proc Natl Acad Sci U S A* 89:295-929.
- 563 21. Singh SK, SaiSree L, Amrutha RN, Reddy M. 2012. Three redundant murein  
564 endopeptidases catalyse an essential cleavage step in peptidoglycan synthesis of  
565 *Escherichia coli* K12. *Mol Microbiol* 86:1036-1051.
- 566 22. Keiler KC, Sauer RT. 1996. Sequence determinants of C-terminal substrate  
567 recognition by the Tsp protease. *J Biol Chem* 271:2589-2593.
- 568 23. Che Y, Fu A, Hou X, McDonald K, Buchanan BB, Huang W, Luan S. 2013. C-  
569 terminal processing of reaction center protein D1 is essential for the function and  
570 assembly of photosystem II in *Arabidopsis*. *Proc Natl Acad Sci U S A* 110:16247-52.
- 571 24. Kumru OS, Bunikis I, Sorokina I, Bergstrom S, Zuckert WR. 2011. Specificity and  
572 role of the *Borrelia burgdorferi* CtpA protease in outer membrane protein  
573 processing. *J Bacteriol* 193:5759-5765.
- 574 25. Blatch GL, Lassel M. 1999. The tetratricopeptide repeat: a structural motif mediating  
575 protein-protein interactions. *Bioessays* 21:932-939.
- 576 26. Chueh CK, Som N, Ke LC, Ho MR, Reddy M, Chang CI. 2019. Structural Basis for  
577 the Differential Regulatory Roles of the PDZ Domain in C-Terminal Processing  
578 Proteases. *mBio* 10.
- 579 27. Keiler KC, Waller PR, Sauer RT. 1996. Role of a peptide tagging system in  
580 degradation of proteins synthesized from damaged messenger RNA. *Science*  
581 271:990-993.
- 582 28. Reiling SA, Jansen JA, Henley BJ, Singh S, Chattin C, Chandler M, Rowen DW.  
583 2005. Prc protease promotes mucoidy in *mucA* mutants of *Pseudomonas*  
584 *aeruginosa*. *Microbiology* 151:2251-2261.
- 585 29. Sautter R, Ramos D, Schnepfer L, Ciofu O, Wassermann T, Koh CL, Heydorn A,  
586 Hentzer M, Hoiby N, Kharazmi A, Molin S, Devries CA, Ohman DE, Mathee K.  
587 2012. A complex multilevel attack on *Pseudomonas aeruginosa algT/U* expression  
588 and *algT/U* activity results in the loss of alginate production. *Gene* 498:242-253.
- 589 30. Banzhaf M, Yau HC, Verheul J, Lodge A, Kritikos G, Mateus A, Cordier B, Hov AK,  
590 Stein F, Wartel M, Pazos M, Solovyova AS, Breukink E, van Teeffelen S, Savitski  
591 MM, den Blaauwen T, Typas A, Vollmer W. 2020. Outer membrane lipoprotein Nlpl  
592 scaffolds peptidoglycan hydrolases within multi-enzyme complexes in *Escherichia*  
593 *coli*. *EMBO J* 39:e102246.
- 594 31. Vogel HJ, Bonner DM. 1956. Acetylornithinase of *Escherichia coli*: partial  
595 purification and some properties. *J Biol Chem* 218:97-106.
- 596 32. Miller VL, Mekalanos JJ. 1988. A novel suicide vector and its use in construction of  
597 insertion mutations: osmoregulation of outer membrane proteins and virulence  
598 determinants in *Vibrio cholerae* requires *toxR*. *J Bacteriol* 170:2575-2583.
- 599 33. Strom MS, Lory S. 1986. Cloning and expression of the pilin gene of *Pseudomonas*  
600 *aeruginosa* PAK in *Escherichia coli*. *J Bacteriol* 165:367-372.

- 601 34. Qiu D, Damron FH, Mima T, Schweizer HP, Yu HD. 2008. PBAD-based shuttle  
602 vectors for functional analysis of toxic and highly regulated genes in *Pseudomonas*  
603 and *Burkholderia* spp. and other bacteria. *Appl Environ Microbiol* 74:7422-7426.
- 604 35. Hoang TT, Karkhoff-Schweizer RR, Kutchma AJ, Schweizer HP. 1998. A broad-  
605 host-range Flp-FRT recombination system for site-specific excision of  
606 chromosomally-located DNA sequences: application for isolation of unmarked  
607 *Pseudomonas aeruginosa* mutants. *Gene* 212:77-86.
- 608
- 609

610 **TABLE 1** Strains and plasmids

| 611 | Name                         | Genotype/Features                                                           | Reference or Source |
|-----|------------------------------|-----------------------------------------------------------------------------|---------------------|
| 612 | <i>P. aeruginosa</i> strains |                                                                             |                     |
| 613 |                              |                                                                             |                     |
| 614 | PAK <sup>a</sup>             | wild type strain                                                            | (33)                |
| 615 | AJDP730                      | $\Delta ctpA$                                                               | (17)                |
| 616 | AJDP1228                     | $\Delta mepM$                                                               | (14)                |
| 617 | AJDP1229                     | $\Delta ctpA \Delta mepM$                                                   | (14)                |
| 618 | AJDP1264                     | $\Delta prc$                                                                | This study          |
| 619 | AJDP1265                     | $\Delta ctpA \Delta prc$                                                    | This study          |
| 620 | AJDP1385                     | $\Delta prc \Delta(PA1198-PA1199)$                                          | This study          |
| 621 | AJDP1386                     | $\Delta ctpA \Delta prc \Delta(PA1198-PA1199)$                              | This study          |
| 622 | AJDP1390                     | $\Delta ctpA \Delta(PA1198-PA1199)$                                         | This study          |
| 623 | Plasmids                     |                                                                             |                     |
| 624 |                              |                                                                             |                     |
| 625 | pHERD20T                     | Amp <sup>r</sup> , pMB1 <i>ori</i> , <i>araBp</i> expression vector         | (34)                |
| 626 | pET-24b(+)                   | Kan <sup>r</sup> , pMB1 <i>ori</i> , <i>T7p</i> expression vector           | Novagen             |
| 627 | pEX18Ap                      | Amp <sup>r</sup> , pMB1 <i>ori</i> , <i>oriT</i> , <i>sacB</i> <sup>+</sup> | (35)                |
| 628 | pQE-30                       | Amp <sup>r</sup> , Col E1 <i>ori</i> , <i>T5p</i> expression vector         | Qiagen              |
| 629 | pAJD2290                     | <i>T7p-ctpA-his<sub>6</sub></i> in pET-24b(+)                               | (17)                |
| 630 | pAJD2653                     | <i>T7p-lbcA-his<sub>6</sub></i> in pET-24b(+)                               | (14)                |
| 631 | pAJD2655                     | <i>T7p-ctpA-S302A-his<sub>6</sub></i> in pET-24b(+)                         | (14)                |
| 632 | pAJD2799                     | <i>araBp-mepM-FLAG</i> in pHERD20T                                          | (14)                |
| 633 | pAJD2805                     | <i>araBp-mepM</i> in pHERD20T                                               | This study          |
| 634 | pAJD2897                     | <i>araBp-PA1199</i> in pHERD20T                                             | This study          |
| 635 | pAJD2909                     | <i>araBp-mepM-Δ6</i> in pHERD20T                                            | This study          |
| 636 | pAJD2912                     | <i>araBp-PA1199-Δ7</i> in pHERD20T                                          | This study          |
| 637 | pAJD2929                     | <i>araBp-mepM-Δ9</i> in pHERD20T                                            | This study          |
| 638 | pAJD2930                     | <i>araBp-mepM-Δ8</i> in pHERD20T                                            | This study          |
| 639 | pAJD2931                     | <i>araBp-mepM-Δ7</i> in pHERD20T                                            | This study          |

|     |          |                                                                                               |            |
|-----|----------|-----------------------------------------------------------------------------------------------|------------|
| 640 | pAJD2935 | <i>araBp</i> -PA3787 in pHERD20T                                                              | This study |
| 641 | pAJD2936 | <i>araBp</i> -PA3787-MepM <sup>CT11</sup> in pHERD20T <sup>b</sup>                            | This study |
| 642 | pAJD2939 | <i>araBp</i> -PA1199-Δ6 in pHERD20T                                                           | This study |
| 643 | pAJD2940 | <i>araBp</i> -PA1199-Δ5 in pHERD20T                                                           | This study |
| 644 | pAJD2941 | <i>araBp</i> -PA1199-Δ4 in pHERD20T                                                           | This study |
| 645 | pAJD2946 | <i>T5p-his6</i> - <i>mepM</i> in pQE-30                                                       | This study |
| 646 | pAJD2947 | <i>T5p-his6</i> - <i>mepM</i> -Δ7 in pQE-30                                                   | This study |
| 647 | pAJD2951 | <i>T5p-his6</i> -PA1199 in pQE-30                                                             | This study |
| 648 | pAJD2952 | <i>T5p-his6</i> -PA1199-Δ7 in pQE-30                                                          | This study |
| 649 | pAJD2953 | <i>araBp</i> -PA1199-Δ7-MepM <sup>CT7</sup> in pHERD20T <sup>c</sup>                          | This study |
| 650 | pAJD2955 | <i>araBp</i> - <i>mepM</i> -Δ7-PA1199 <sup>CT7</sup> in pHERD20T <sup>d</sup>                 | This study |
| 651 | pAJD2971 | <i>araBp</i> -PA1199-Δ7-AGEAGHL in pHERD20T                                                   | This study |
| 652 | pAJD2972 | <i>araBp</i> - <i>mepM</i> -Δ7-AGEAGHL in pHERD20T                                            | This study |
| 653 | pAJD2982 | <i>araBp</i> - <i>mepM lbcA</i> -FLAG in pHERD20T                                             | This study |
| 654 | pAJD2983 | <i>araBp</i> - <i>mepM</i> -Δ7 <i>lbcA</i> -FLAG in pHERD20T                                  | This study |
| 655 | pAJD2984 | <i>araBp</i> - <i>mepM</i> <sup>EC</sup> -FLAG in pHERD20T <sup>e</sup>                       | This study |
| 656 | pAJD2985 | <i>araBp</i> - <i>mepM</i> <sup>EC</sup> -MepM <sup>CT11</sup> -FLAG in pHERD20T <sup>f</sup> | This study |
| 657 | pAJD2992 | <i>araBp</i> -PA1199 <i>lbcA</i> -FLAG in pHERD20T                                            | This study |
| 658 | pAJD2993 | <i>araBp</i> -PA1199-Δ7 <i>lbcA</i> -FLAG in pHERD20T                                         | This study |

---

659  
660 <sup>a</sup> All *P. aeruginosa* strains are derivatives of strain PAK

661 <sup>b</sup> PA3787 with the C-terminal seven amino acids of MepM added to its C-terminus

662 <sup>c</sup> PA1199 with its C-terminal seven amino acids replaced by those of MepM

663 <sup>d</sup> MepM with its C-terminal seven amino acids replaced by those of PA1199

664 <sup>e</sup> *mepM*<sup>EC</sup> is the *E. coli mepM* gene

665

666 <sup>f</sup> *E. coli* MepM with the eleven C-terminal seven amino acids of *P. aeruginosa* MepM

667 added to its C-terminus

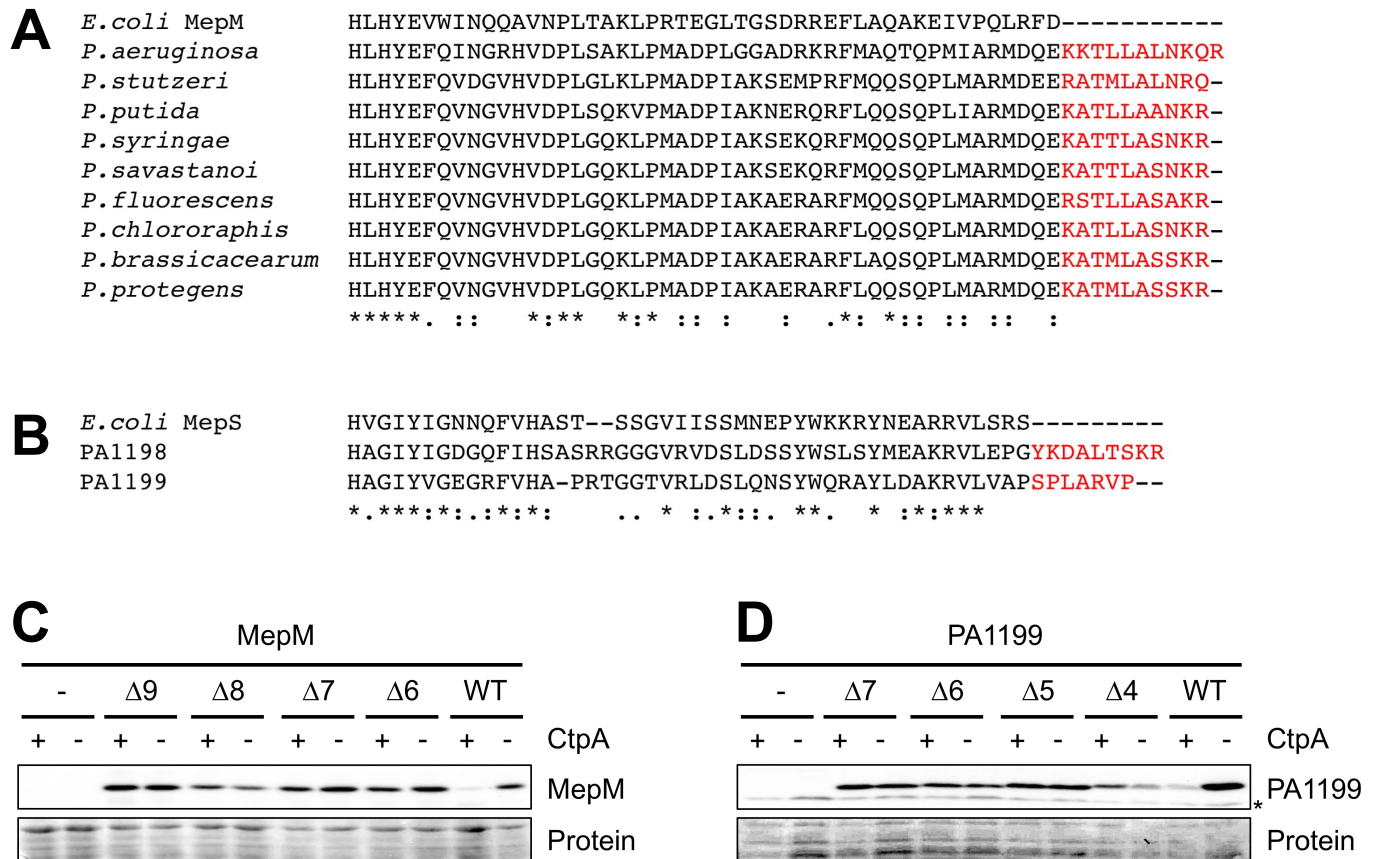

**FIG 1** Truncation of the C-termini of MepM and PA1199 protects them from degradation by CtpA *in vivo*. (A) CLUSTAL Omega alignment of the C-termini of MepM proteins from *E. coli* and *Pseudomonas* species. (B) CLUSTAL Omega alignment of the C-termini of *E. coli* MepS, and PA1198 and PA1199 from *P. aeruginosa*. For panels A and B, amino acids in red represent C-terminal extensions in the *Pseudomonas* proteins. (C) MepM immunoblot analysis of equivalent amounts of whole-cell lysates of *ctpA*<sup>+</sup> and  $\Delta$ *ctpA* strains. (D) PA1199 immunoblot analysis of equivalent amounts of whole-cell lysates of *ctpA*<sup>+</sup> and  $\Delta$ *ctpA* strains (an asterisk indicates a protein cross-reactive with the PA1199 antiserum). For panels C and D, strains contained an arabinose-inducible expression plasmid encoding wild type MepM or PA1199 (WT), or derivatives with the indicated number of amino acids removed from the C-terminus, and were grown in medium containing arabinose. MepM or PA1199 were detected with polyclonal antisera, and a Ponceau S total protein stain of the same region of the nitrocellulose membrane is shown to document loading levels.

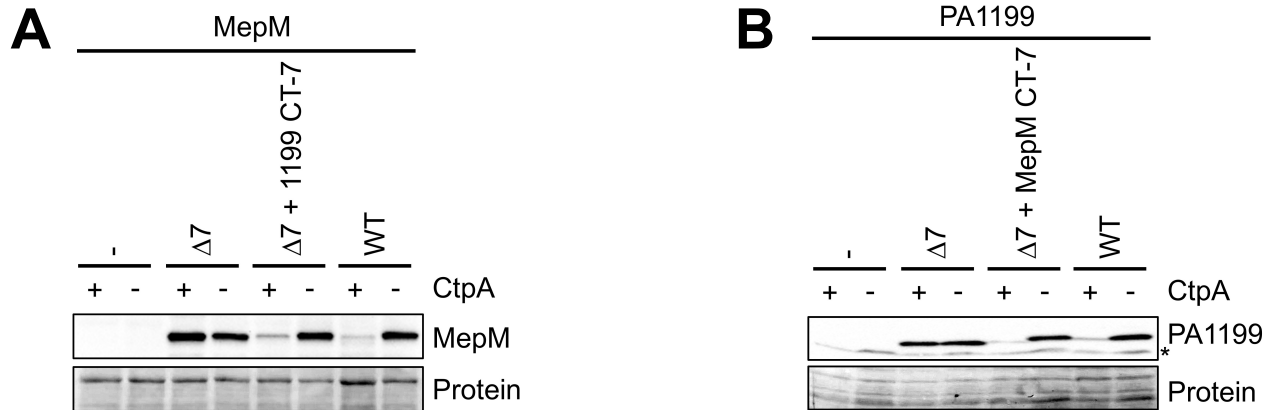

**FIG 2** Substrate C-termini are interchangeable for degradation by CtpA. (A) MepM immunoblot analysis of equivalent amounts of whole-cell lysates of *ctpA*<sup>+</sup> and  $\Delta$ *ctpA* strains. Strains contained an arabinose-inducible expression plasmid encoding wild type MepM (WT), or derivatives with seven amino acids removed from the C-terminus ( $\Delta 7$ ), or with the C-terminal seven amino acids replaced by those from PA1199 ( $\Delta 7 + 1199$  CT-7). (B) PA1199 immunoblot analysis of equivalent amounts of whole-cell lysates of *ctpA*<sup>+</sup> and  $\Delta$ *ctpA* strains (an asterisk indicates a protein cross-reactive with the PA1199 antiserum). Strains contained an arabinose-inducible expression plasmid encoding wild type PA1199 (WT), or derivatives with seven amino acids removed from the C-terminus ( $\Delta 7$ ), or with the C-terminal seven amino acids replaced by those from MepM ( $\Delta 7 + \text{MepM CT-7}$ ). For both panels, strains were grown in medium containing arabinose. MepM or PA1199 were detected with polyclonal antisera, and a Ponceau S total protein stain of the same region of the nitrocellulose membrane is shown to document loading levels.



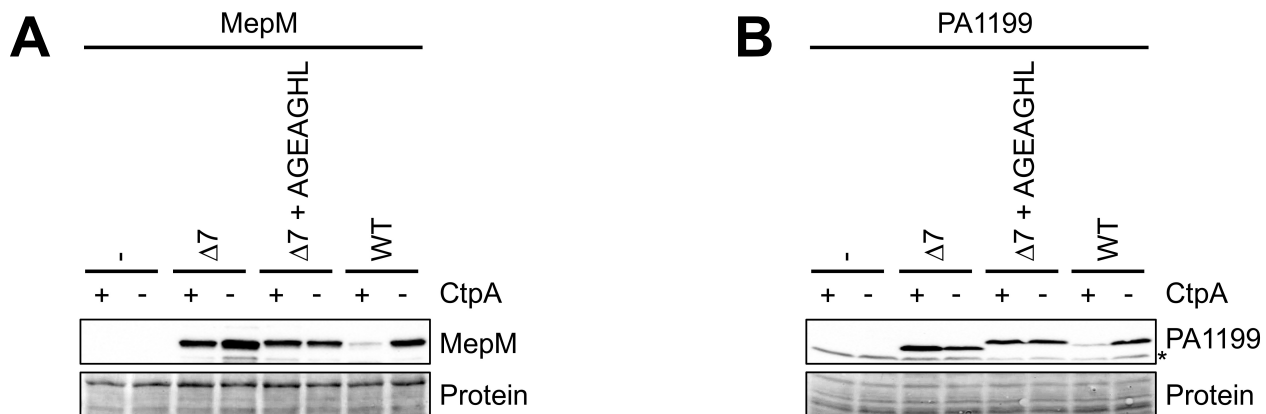

**FIG 3** Restoring the length of truncated substrates is not sufficient for CtpA-dependent degradation. (A) MepM immunoblot analysis of equivalent amounts of whole-cell lysates of *ctpA*<sup>+</sup> and  $\Delta$ *ctpA* strains. Strains contained an arabinose-inducible expression plasmid encoding wild type MepM (WT), or derivatives with seven amino acids removed from the C-terminus ( $\Delta$ 7), or with the C-terminal seven amino acids replaced by AGEAGHL. (B) PA1199 immunoblot analysis of equivalent amounts of whole-cell lysates of *ctpA*<sup>+</sup> and  $\Delta$ *ctpA* strains (an asterisk indicates a protein cross-reactive with the PA1199 antiserum). Strains contained an arabinose-inducible expression plasmid encoding wild type PA1199 (WT), or derivatives with seven amino acids removed from the C-terminus ( $\Delta$ 7), or with the C-terminal seven amino acids replaced by AGEAGHL. For both panels, strains were grown in medium containing arabinose. MepM or PA1199 were detected with polyclonal antisera, and a Ponceau S total protein stain of the same region of the nitrocellulose membrane is shown to document loading levels.

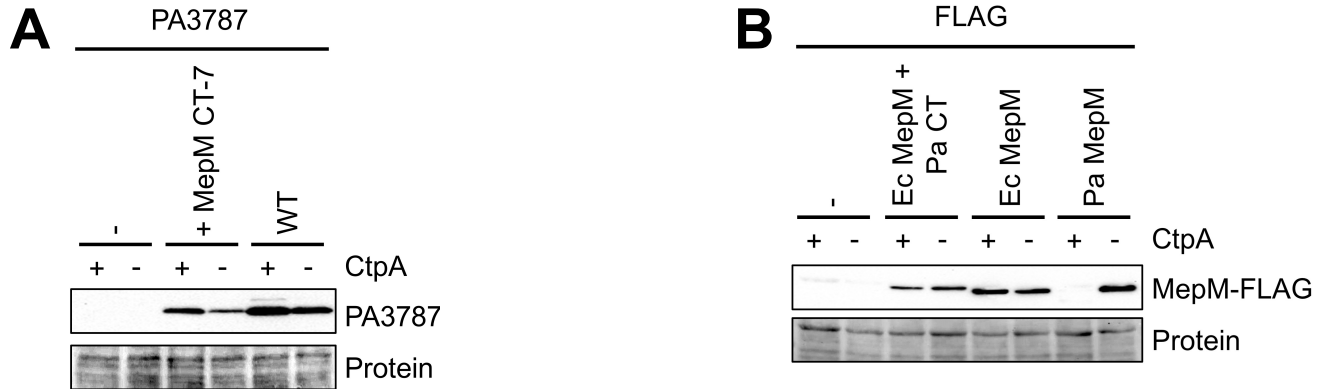

**FIG 4** The C-terminal motif of a CtpA substrate is not sufficient for CtpA-dependent degradation. (A) PA3787 immunoblot analysis of equivalent amounts of whole-cell lysates of *ctpA*<sup>+</sup> and  $\Delta$ *ctpA* strains. Strains contained an arabinose-inducible expression plasmid encoding wild type PA3787 (WT), or a derivate with the seven C-terminal amino acids from MepM added to its C-terminus. (B) Anti-FLAG immunoblot analysis of equivalent amounts of whole-cell lysates of *ctpA*<sup>+</sup> and  $\Delta$ *ctpA* strains. Strains contained an arabinose-inducible expression plasmid encoding *P. aeruginosa* MepM (Pa), *E. coli* MepM (Ec), or *E. coli* MepM with the eleven C-terminal amino acids from *P. aeruginosa* MepM added to its C-terminus (+ Pa CT). The C-termini of all proteins terminated with the FLAG-tag sequence. For both panels, strains were grown in medium containing arabinose. Proteins were detected with anti-FLAG monoclonal antibodies, and a Ponceau S total protein stain of the same region of the nitrocellulose membrane is shown to document loading levels.

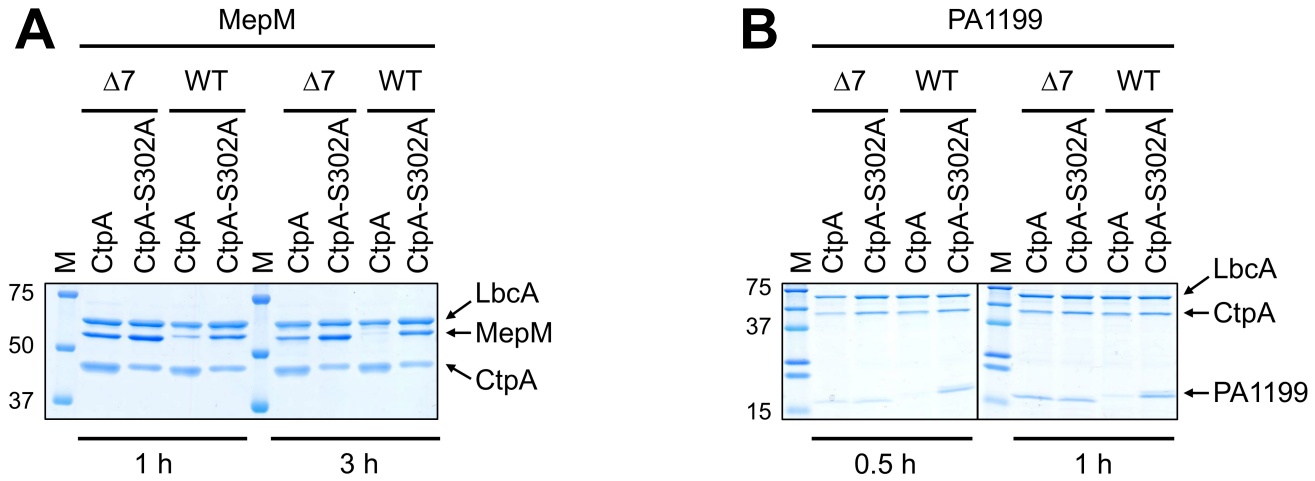

**FIG 5** Truncation of the C-termini of MepM and PA1199 protects them from degradation by CtpA *in vitro*. (A) His<sub>6</sub>-MepM (WT) or His<sub>6</sub>-MepM- $\Delta 7$  proteins were incubated with LbcA-His<sub>6</sub> and either active CtpA-His<sub>6</sub> (CtpA) or inactive CtpA-S302A-His<sub>6</sub> (CtpA-S302A), for 1 h or 3 h. Samples were separated by 10% SDS-PAGE and stained with ProtoBlue Safe (National Diagnostics). (B) His<sub>6</sub>-PA1199 (WT) or His<sub>6</sub>-PA1199- $\Delta 7$  proteins were incubated with LbcA-His<sub>6</sub> and either active CtpA-His<sub>6</sub> (CtpA) or inactive CtpA-S302A-His<sub>6</sub> (CtpA-S302A), for 0.5 h or 1 h. Samples were analyzed on a single 16% SDS-PAGE gel, but the order of the left- and right-hand sides of the gel was reversed to construct the image, indicated by the vertical black line. For both panels, approximate kDa size of molecular-mass-marker proteins (M) are indicated on the left-hand side.

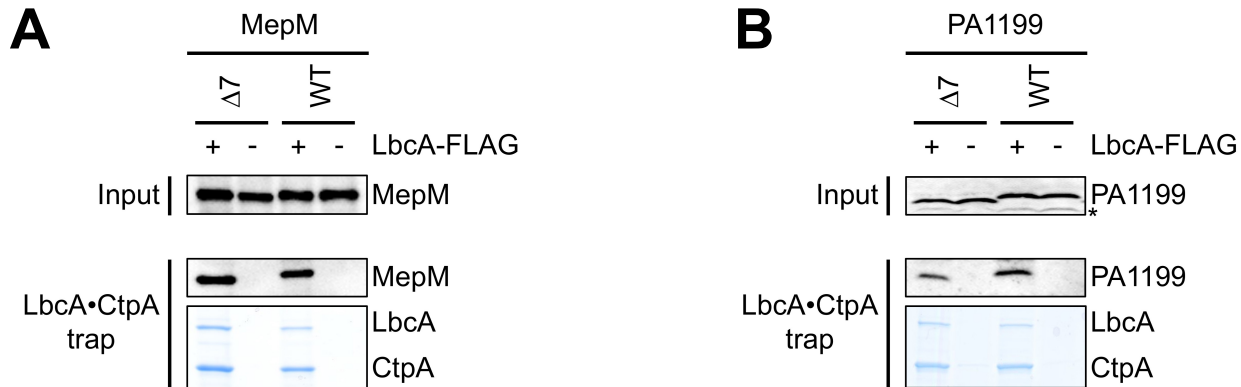

**FIG 6** Truncation of the C-terminus does not prevent substrates from associating with the LbcA•CtpA complex *in vivo*. (A) Proteins were purified from detergent solubilized lysates of  $\Delta mepM \Delta ctpA$  strains, which contained one plasmid encoding CtpA-S302A-His<sub>6</sub> and a second plasmid encoding MepM or MepM- $\Delta 7$  and LbcA-FLAG (+), or MepM or MepM- $\Delta 7$  only (-). (B) Proteins were purified from detergent solubilized lysates of  $\Delta(PA1198-PA1199) \Delta ctpA$  strains, which contained one plasmid encoding CtpA-S302A-His<sub>6</sub> and a second plasmid encoding PA1199 or PA1199- $\Delta 7$  and LbcA-FLAG (+), or PA1199 or PA1199- $\Delta 7$  only (-). For both panels, tandem affinity purification of the LbcA•CtpA-S302A complex was done with nickel agarose followed by anti-FLAG M2 agarose resin. Input lysates (Input) and purified samples (LbcA•CtpA trap) were separated by SDS-PAGE and analyzed by anti-MepM (A) or anti-PA1199 (B) immunoblot (an asterisk indicates a protein cross-reactive with the PA1199 antiserum). Purified samples were also separated by SDS-PAGE and stained with ProtoBlue Safe (National Diagnostics) to monitor recovery of the LbcA•CtpA complex.

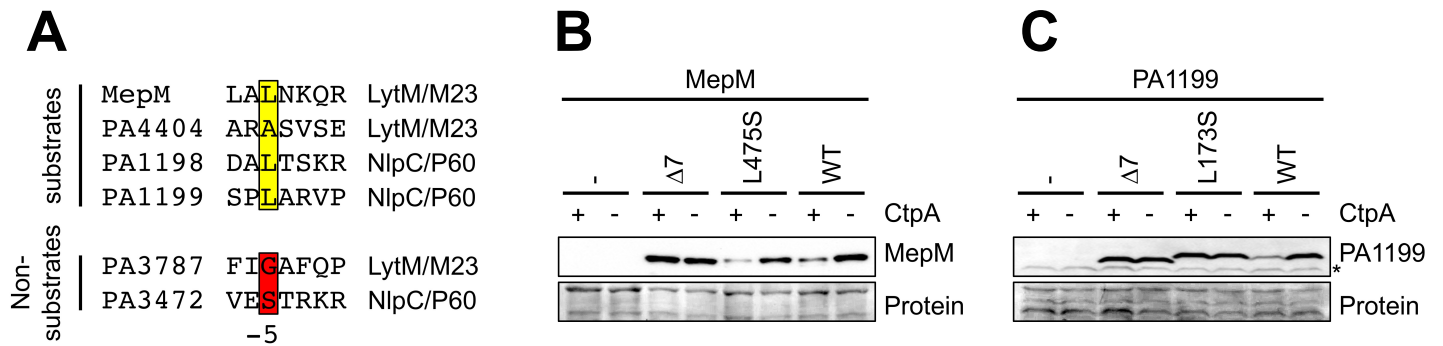

**FIG 7** Mutation of the -5 position affects the CtpA-dependent stability of MepM and PA1199 differently. (A) Alignment of the C-terminal seven amino acids of predicted peptidoglycan cross-link hydrolases in the LytM/M23 or NlpC/P60 peptidase families that either are or are not CtpA substrates. The -5 positions of the substrates and non-substrates are highlighted yellow or red, respectively. (B) MepM immunoblot analysis of equivalent amounts of whole-cell lysates of *ctpA*<sup>+</sup> and  $\Delta$ *ctpA* strains. (C) PA1199 immunoblot analysis of equivalent amounts of whole-cell lysates of *ctpA*<sup>+</sup> and  $\Delta$ *ctpA* strains (an asterisk indicates a protein cross-reactive with the PA1199 antiserum). For panels B and C, strains were grown in medium containing arabinose and contained an arabinose-inducible expression plasmid encoding wild type MepM or PA1199 (WT), or derivatives with the indicated amino acid substitution at the -5 position, or with seven amino acids removed from the C-terminus ( $\Delta 7$ ). MepM or PA1199 were detected with polyclonal antisera, and a Ponceau S total protein stain of the same region of the nitrocellulose membrane is shown to document loading levels.
